# Supplementary material
Source: HighWire-hosted journal article supplement (https://oem.bmj.com/content/80/2/77)
Supplement: inline-supplementary-material-2 [file inline-supplementary-material-2.pdf]

**Supplementary File 2 for: Firefighter occupational factors and the risk of preterm birth: results from a cohort of women firefighters in the United States**

Alesia M Jung, PhD<sup>1,2</sup>; Sara A Jahnke, PhD<sup>3</sup>; Leslie K Dennis, MS, PhD<sup>1</sup>; Melanie L Bell, PhD<sup>1</sup>;  
Jefferey L Burgess, MS, MD, MPH<sup>2</sup>; Leslie V Farland, ScD<sup>1,4</sup>

<sup>1</sup> Department of Epidemiology and Biostatistics, Mel and Enid Zuckerman College of Public Health, University of Arizona, Tucson, Arizona, US.

<sup>2</sup> Department of Community, Environment and Policy, Mel and Enid Zuckerman College of Public Health, University of Arizona, Tucson, Arizona, US.

<sup>3</sup> Center for Fire, Rescue, & EMS Health Research, NDRI-USA, Leawood, Kansas, US.

<sup>4</sup> Department of Obstetrics and Gynecology, College of Medicine-Tucson, University of Arizona, Tucson, Arizona, US.

**Included in this file:**  
**Table S2 – S5**

## Table of Contents

|                                                                                                                                                    |   |
|----------------------------------------------------------------------------------------------------------------------------------------------------|---|
| <b>Table S2.</b> Occupational factors and risk of preterm birth during most recent pregnancy in fire service among 934 pregnancies.....            | 3 |
| <b>Table S3.</b> Occupational factors and risk of preterm birth during first pregnancy in the fire service among 934 pregnancies.....              | 4 |
| <b>Table S4.</b> Occupational factors and risk of preterm birth using MICE to impute missing responses, among 941 women and 1,371 pregnancies..... | 5 |
| <b>Table S5.</b> Occupational factors and risk of preterm birth adjusted for additional risk factors, among 916 women and 1,335 pregnancies.....   | 6 |

**Table S2.** Occupational factors and risk of preterm birth during most recent pregnancy in fire service among 934 pregnancies<sup>a,b</sup>

|                                                       |                                       | Preterm births<br>N (%) |          | RR (95% CI)<br>Model 1 <sup>c</sup> | RR (95% CI)<br>Model 2 <sup>d</sup> | RR (95% CI)<br>Model 3 <sup>e</sup> |
|-------------------------------------------------------|---------------------------------------|-------------------------|----------|-------------------------------------|-------------------------------------|-------------------------------------|
| <b>Firefighter subgroups</b>                          |                                       |                         |          |                                     |                                     |                                     |
| Employment, stratified by wildland firefighter status |                                       |                         |          |                                     |                                     |                                     |
| Structural firefighter                                |                                       | No                      | Yes      |                                     |                                     |                                     |
|                                                       | Career                                | 433 (85%)               | 78 (15%) | 1.00 (Ref.)                         | 1.00 (Ref.)                         | -                                   |
|                                                       | Volunteer                             | 71 (79%)                | 19 (21%) | 1.36 (0.84 - 2.20)                  | 1.27 (0.77 - 2.09)                  | -                                   |
| Wildland/combination firefighter                      |                                       | No                      | Yes      |                                     |                                     |                                     |
|                                                       | Career                                | 290 (95%)               | 15 (5%)  | 1.00 (Ref.)                         | 1.00 (Ref.)                         | -                                   |
|                                                       | Volunteer                             | 19 (73%)                | 7 (27%)  | 4.72 (1.69 - 13.17)                 | 2.90 (1.23 - 6.81)                  | -                                   |
| <b>Work practices</b>                                 |                                       |                         |          |                                     |                                     |                                     |
| Shift schedule of career firefighters                 |                                       |                         |          |                                     |                                     |                                     |
|                                                       | Less than 24 hr on shift              | 135 (88%)               | 19 (12%) | 1.00 (Ref.)                         | 1.00 (Ref.)                         | -                                   |
|                                                       | 24 or more hr on shift                | 587 (91%)               | 75 (11%) | 0.96 (0.60 - 1.55)                  | 1.12 (0.69 - 1.81)                  | -                                   |
| <b>Fire responses during pregnancy</b>                |                                       |                         |          |                                     |                                     |                                     |
| Worked fire/rescue calls at pregnancy start           |                                       |                         |          |                                     |                                     |                                     |
|                                                       | No                                    | 176 (87%)               | 27 (13%) | 1.00 (Ref.)                         | 1.00 (Ref.)                         | 1.00 (Ref.)                         |
|                                                       | Yes                                   | 630 (88%)               | 88 (12%) | 0.99 (0.66 - 1.48)                  | 1.07 (0.74 - 1.66)                  | 1.15 (0.67 - 1.74)                  |
| Number of fires responded to during pregnancy         |                                       |                         |          |                                     |                                     |                                     |
|                                                       | 0 fires                               | 208 (86%)               | 35 (14%) | 1.00 (Ref.)                         | 1.00 (Ref.)                         | 1.00 (Ref.)                         |
|                                                       | 1-4 fires                             | 285 (83%)               | 57 (17%) | 1.23 (0.82 - 1.82)                  | 1.22 (0.82 - 1.82)                  | 1.26 (0.84 - 1.88)                  |
|                                                       | ≥5 fires                              | 300 (93%)               | 22 (7%)  | 0.54 (0.32 - 0.91)                  | 0.68 (0.39 - 1.17)                  | 0.68 (0.40 - 1.17)                  |
| <b>Work restriction during pregnancy</b>              |                                       |                         |          |                                     |                                     |                                     |
| Was work restricted during pregnancy?                 |                                       |                         |          |                                     |                                     |                                     |
|                                                       | No                                    | 172 (86%)               | 27 (14%) | 1.00 (Ref.)                         | 1.00 (Ref.)                         | 1.00 (Ref.)                         |
|                                                       | Yes                                   | 624 (88%)               | 85 (12%) | 0.94 (0.63 - 1.40)                  | 1.01 (0.58 - 1.75)                  | 0.99 (0.58 - 1.72)                  |
| Timing of start of work restriction                   |                                       |                         |          |                                     |                                     |                                     |
|                                                       | None/during 3 <sup>rd</sup> trimester | 209 (86%)               | 35 (14%) | 1.00 (Ref.)                         | 1.00 (Ref.)                         | 1.00 (Ref.)                         |
|                                                       | 2 <sup>nd</sup> trimester             | 392 (93%)               | 29 (7%)  | 0.52 (0.33 - 0.83)                  | 0.62 (0.38 - 1.01)                  | 0.66 (0.40 - 1.09)                  |
|                                                       | 1 <sup>st</sup> trimester             | 202 (81%)               | 48 (19%) | 1.34 (0.90 - 1.99)                  | 1.35 (0.91 - 2.00)                  | 1.42 (0.95 - 2.11)                  |

RR= Relative risk; CI= confidence interval; BMI= Body mass index (kg/m<sup>2</sup>); Combination= does wildland firefighting in addition to working for a career or volunteer department

<sup>a</sup> Generalized estimating equations with Poisson distribution and sandwich variance estimators were used to estimate risk ratios and 95% CIs.

<sup>b</sup> 93 total pregnancies had missing information for Shift schedule (3), Worked fire/rescue calls (4), Number of fires (37), Work restriction (19), Time of work restriction (30) and were not included in those models.

<sup>c</sup> Model 1 is adjusted for age at pregnancy, modeled as age at pregnancy and age at pregnancy<sup>2</sup>.

<sup>d</sup> Model 2 is additionally adjusted for highest education completed (some college/at least college degree), gravidity (yes/no), BMI (<30 kg/m<sup>2</sup> / ≥30 kg/m<sup>2</sup>), and smoking status (current or former/never). Highest education completed, BMI, and smoking status were measured in 2017 at time of survey. Gravidity was assessed for each pregnancy.

<sup>e</sup> Model 3 is additionally adjusted for employment status (career/volunteer).

**Table S3.** Occupational factors and risk of preterm birth during first pregnancy in the fire service among 934 pregnancies<sup>a,b</sup>

|                                                       |                                       | Preterm births<br>N (%) |           | RR (95% CI)<br>Model 1 <sup>c</sup> | RR (95% CI)<br>Model 2 <sup>d</sup> | RR (95% CI)<br>Model 3 <sup>e</sup> |
|-------------------------------------------------------|---------------------------------------|-------------------------|-----------|-------------------------------------|-------------------------------------|-------------------------------------|
| <b>Firefighter subgroups</b>                          |                                       |                         |           |                                     |                                     |                                     |
| Employment, stratified by wildland firefighter status |                                       |                         |           |                                     |                                     |                                     |
| Structural                                            |                                       | No                      | Yes       |                                     |                                     |                                     |
|                                                       | Career                                | 444 (87%)               | 67 (13%)  | 1.00 (Ref.)                         | 1.00 (Ref.)                         | -                                   |
| Wildland/combination                                  | Volunteer                             | 68 (76%)                | 22 (24%)  | 1.82 (1.15 - 2.88)                  | 1.77 (1.11 - 2.82)                  | -                                   |
|                                                       |                                       | No                      | Yes       |                                     |                                     |                                     |
| Career                                                |                                       | 287 (94%)               | 18 (6%)   | 1.00 (Ref.)                         | 1.00 (Ref.)                         | -                                   |
|                                                       | Volunteer                             | 20 (77%)                | 6 (23%)   | 3.16 (1.20 - 8.33)                  | 1.49 (0.58 - 3.79)                  | -                                   |
| <b>Work practices</b>                                 |                                       |                         |           |                                     |                                     |                                     |
| Shift schedule of career firefighters                 |                                       |                         |           |                                     |                                     |                                     |
|                                                       |                                       | No                      | Yes       |                                     |                                     |                                     |
|                                                       | Less than 24 hr on shift              | 128 (83%)               | 26 (17%)  | 1.00 (Ref.)                         | 1.00 (Ref.)                         | -                                   |
|                                                       | 24 or more hr on shift                | 602 (91%)               | 60 (9%)   | 0.58 (0.37 - 0.89)                  | 0.66 (0.42 - 1.03)                  | -                                   |
| <b>Fire responses during pregnancy</b>                |                                       |                         |           |                                     |                                     |                                     |
| Worked fire/rescue calls at pregnancy start           |                                       |                         |           |                                     |                                     |                                     |
|                                                       |                                       | No                      | Yes       |                                     |                                     |                                     |
|                                                       | No                                    | 63 (88%)                | 9 (12%)   | 1.00 (Ref.)                         | 1.00 (Ref.)                         | 1.00 (Ref.)                         |
|                                                       | Yes                                   | 753 (88%)               | 104 (12%) | 1.10 (0.59 - 2.07)                  | 1.18 (0.62 - 2.22)                  | 1.14 (0.61 - 2.16)                  |
| Number of fires responded to during pregnancy         |                                       |                         |           |                                     |                                     |                                     |
|                                                       |                                       | No                      | Yes       |                                     |                                     |                                     |
|                                                       | 0 fires                               | 181 (86%)               | 29 (14%)  | 1.00 (Ref.)                         | 1.00 (Ref.)                         | 1.00 (Ref.)                         |
|                                                       | 1-4 fires                             | 304 (85%)               | 52 (15%)  | 1.21 (0.78 - 1.87)                  | 1.17 (0.76 - 1.82)                  | 1.26 (0.81 - 1.95)                  |
|                                                       | ≥5 fires                              | 314 (92%)               | 27 (8%)   | 0.68 (0.40 - 1.14)                  | 0.82 (0.49 - 1.38)                  | 0.84 (0.50 - 1.41)                  |
| <b>Work restriction during pregnancy</b>              |                                       |                         |           |                                     |                                     |                                     |
| Was work restricted during pregnancy?                 |                                       |                         |           |                                     |                                     |                                     |
|                                                       |                                       | No                      | Yes       |                                     |                                     |                                     |
|                                                       | No                                    | 165 (85%)               | 30 (15%)  | 1.00 (Ref.)                         | 1.00 (Ref.)                         | 1.00 (Ref.)                         |
|                                                       | Yes                                   | 643 (89%)               | 81 (11%)  | 0.77 (0.52 - 1.29)                  | 0.88 (0.59 - 1.29)                  | 0.94 (0.62 - 1.41)                  |
| Timing of start of work restriction                   |                                       |                         |           |                                     |                                     |                                     |
|                                                       |                                       | No                      | Yes       |                                     |                                     |                                     |
|                                                       | None/during 3 <sup>rd</sup> trimester | 194 (84%)               | 37 (16%)  | 1.00 (Ref.)                         | 1.00 (Ref.)                         | 1.00 (Ref.)                         |
|                                                       | 2 <sup>nd</sup> trimester             | 378 (93%)               | 28 (7%)   | <b>0.46 (0.29 - 0.74)</b>           | <b>0.56 (0.35 - 0.90)</b>           | 0.61 (0.37 - 1.00)                  |
|                                                       | 1 <sup>st</sup> trimester             | 228 (84%)               | 44 (16%)  | 1.00 (0.67 - 1.49)                  | 1.04 (0.69 - 1.55)                  | 1.13 (0.75 - 1.72)                  |

RR= Relative risk; CI= confidence interval; BMI= Body mass index (kg/m<sup>2</sup>); Combination= does wildland firefighting in addition to working for a career or volunteer department<sup>a</sup> Generalized estimating equations with Poisson distribution and sandwich variance estimators were used to estimate risk ratios and 95% CIs.<sup>b</sup> 74 total pregnancies had missing information for Shift schedule (2), Worked fire/rescue calls (5), Number of fires (27), Work restriction (15), Time of work restriction (25) and were not included in those models.<sup>c</sup> Model 1 is adjusted for age at pregnancy, modeled as age at pregnancy and age at pregnancy<sup>2</sup>.<sup>d</sup> Model 2 is additionally adjusted for highest education completed (some college/at least college degree), gravidity (yes/no), BMI (<30 kg/m<sup>2</sup> / ≥30 kg/m<sup>2</sup>), and smoking status (current or former/never). Education, BMI, and smoking status were measured in 2017 at time of survey. Gravidity was assessed for each pregnancy.<sup>e</sup> Model 3 is additionally adjusted for employment status (career/volunteer).

**Table S4.** Occupational factors and risk of preterm birth using MICE to impute missing responses, among 941 women and 1,371 pregnancies<sup>a,b</sup>

|                                                       |                                       | Preterm births<br>N (%) |          | RR (95% CI)<br>Model 1 <sup>c</sup> | RR (95% CI)<br>Model 2 <sup>d</sup> | RR (95% CI)<br>Model 3 <sup>e</sup> |
|-------------------------------------------------------|---------------------------------------|-------------------------|----------|-------------------------------------|-------------------------------------|-------------------------------------|
| <b>Firefighter subgroups</b>                          |                                       |                         |          |                                     |                                     |                                     |
| Employment, stratified by wildland firefighter status |                                       |                         |          |                                     |                                     |                                     |
| Structural                                            |                                       | No                      | Yes      |                                     |                                     |                                     |
|                                                       | Career                                | 718 (87)                | 104 (13) | 1.00 (Ref.)                         | 1.00 (Ref.)                         | -                                   |
|                                                       | Volunteer                             | 105 (81)                | 25 (19)  | 1.52 (0.97 - 2.38)                  | 1.44 (0.91 - 2.29)                  | -                                   |
| Wildland/combination                                  |                                       | No                      | Yes      |                                     |                                     |                                     |
|                                                       | Career                                | 359 (94)                | 22 (6)   | 1.00 (Ref.)                         | 1.00 (Ref.)                         | -                                   |
|                                                       | Volunteer                             | 24 (69)                 | 11 (31)  | 4.29 (1.82 - 10.11)                 | 2.46 (1.01 - 6.06)                  | -                                   |
| <b>Work practices</b>                                 |                                       |                         |          |                                     |                                     |                                     |
| Shift schedule of career firefighters                 |                                       |                         |          |                                     |                                     |                                     |
|                                                       | No                                    |                         | Yes      |                                     |                                     |                                     |
|                                                       | Less than 24 hr on shift              | 179 (87)                | 27 (13)  | 1.00 (Ref.)                         | 1.00 (Ref.)                         | -                                   |
|                                                       | 24 or more hr on shift                | 671 (92)                | 60 (8)   | 0.82 (0.56 - 1.20)                  | 0.90 (0.60 - 1.35)                  | -                                   |
| <b>Fire responses during pregnancy</b>                |                                       |                         |          |                                     |                                     |                                     |
| Worked fire/rescue calls at pregnancy start           |                                       |                         |          |                                     |                                     |                                     |
|                                                       | No                                    | 120 (90)                | 14 (10)  | 1.00 (Ref.)                         | 1.00 (Ref.)                         | 1.00 (Ref.)                         |
|                                                       | Yes                                   | 1082 (88)               | 148 (12) | 1.20 (0.72 - 2.02)                  | 1.23 (0.74 - 2.05)                  | 1.21 (0.73 - 2.02)                  |
| Number of fires responded to during pregnancy         |                                       |                         |          |                                     |                                     |                                     |
|                                                       | No                                    |                         | Yes      |                                     |                                     |                                     |
|                                                       | 0 fires                               | 314 (87)                | 46 (13)  | 1.00 (Ref.)                         | 1.00 (Ref.)                         | 1.00 (Ref.)                         |
|                                                       | 1-4 fires                             | 473 (86)                | 75 (14)  | 1.17 (0.81 - 1.67)                  | 1.15 (0.80 - 1.65)                  | 1.19 (0.83 - 1.70)                  |
|                                                       | ≥5 fires                              | 383 (92)                | 34 (8)   | 0.70 (0.41 - 1.10)                  | 0.82 (0.53 - 1.29)                  | 0.83 (0.54 - 1.29)                  |
| <b>Work restriction during pregnancy</b>              |                                       |                         |          |                                     |                                     |                                     |
| Was work restricted during pregnancy?                 |                                       |                         |          |                                     |                                     |                                     |
|                                                       | No                                    | 262 (87)                | 39 (13)  | 1.00 (Ref.)                         | 1.00 (Ref.)                         | 1.00 (Ref.)                         |
|                                                       | Yes                                   | 929 (89)                | 117 (11) | 0.87 (0.60 - 1.26)                  | 0.96 (0.66 - 1.38)                  | 1.01 (0.69 - 1.47)                  |
| Timing of start of work restriction                   |                                       |                         |          |                                     |                                     |                                     |
|                                                       | No                                    |                         | Yes      |                                     |                                     |                                     |
|                                                       | None/during 3 <sup>rd</sup> trimester | 318 (86)                | 51 (14)  | 1.00 (Ref.)                         | 1.00 (Ref.)                         | 1.00 (Ref.)                         |
|                                                       | 2 <sup>nd</sup> trimester             | 507 (92)                | 42 (8)   | 0.58 (0.38 - 0.87)                  | 0.65 (0.43 - 0.99)                  | 0.68 (0.44 - 1.04)                  |
|                                                       | 1 <sup>st</sup> trimester             | 357 (86)                | 59 (14)  | 1.05 (0.72 - 1.53)                  | 1.08 (0.74 - 1.57)                  | 1.11 (0.76 - 1.62)                  |

MICE= multiple imputation with chained equations; RR= Relative risk; CI= confidence interval; BMI= Body mass index (kg/m<sup>2</sup>); Combination= does wildland firefighting in addition to working for a career or volunteer department

<sup>a</sup> Generalized estimating equations with Poisson distribution and sandwich variance estimators were used to estimate risk ratios and 95% CIs.

<sup>b</sup> 117 total pregnancies had missing information for Shift schedule (3), Worked fire/rescue calls (7), Number of fires (46), Work restriction (24), Time of work restriction (37) and were not included in those models.

<sup>c</sup> Model 1 is adjusted for age at pregnancy, modeled as age at pregnancy and age at pregnancy<sup>2</sup>.

<sup>d</sup> Model 2 is additionally adjusted for highest education completed (some college/at least college degree), gravidity (yes/no), BMI (<30 kg/m<sup>2</sup> / ≥30 kg/m<sup>2</sup>), and smoking (current or former/never). Education, BMI, and smoking status were measured in 2017 at time of survey. Gravidity was assessed for each pregnancy.

<sup>e</sup> Model 3 is additionally adjusted for employment status (career/volunteer).

**Table S5.** Occupational factors and risk of preterm birth adjusted for other risk factors, among 916 women and 1,335 pregnancies<sup>a,b</sup>

|                                                       |                                       | Preterm births<br>N (%) |           | RR (95% CI)<br>Model 2 <sup>c</sup> | RR (95% CI)<br>Model 3 <sup>d</sup> | RR (95% CI)<br>Model 4 <sup>e</sup> |
|-------------------------------------------------------|---------------------------------------|-------------------------|-----------|-------------------------------------|-------------------------------------|-------------------------------------|
| <b>Firefighter subgroups</b>                          |                                       |                         |           |                                     |                                     |                                     |
| Employment, stratified by wildland firefighter status |                                       |                         |           |                                     |                                     |                                     |
| Structural                                            |                                       | No                      | Yes       |                                     |                                     |                                     |
|                                                       | Career                                | 703 (87%)               | 102 (12%) | 1.00 (Ref.)                         | 1.00 (Ref.)                         | 1.00 (Ref.)                         |
|                                                       | Volunteer                             | 101 (81%)               | 23 (19)   | 1.37 (0.85 - 2.22)                  | 1.33 (0.85 - 2.08)                  | 1.35 (0.84 - 2.17)                  |
| Wildland/combination                                  |                                       | No                      | Yes       |                                     |                                     |                                     |
|                                                       | Career                                | 352 (95%)               | 20 (5%)   | 1.00 (Ref.)                         | 1.00 (Ref.)                         | 1.00 (Ref.)                         |
|                                                       | Volunteer                             | 21 (68%)                | 10 (32%)  | 2.81 (1.11 - 7.08)                  | 2.86 (1.16 - 7.09)                  | 2.63 (1.00 - 7.01)                  |
| <b>Work practices</b>                                 |                                       |                         |           |                                     |                                     |                                     |
| Shift schedule of career firefighters                 |                                       |                         |           |                                     |                                     |                                     |
|                                                       | Less than 24 hr on shift              | 226 (88%)               | 32 (12%)  | 1.00 (Ref.)                         | 1.00 (Ref.)                         | 1.00 (Ref.)                         |
|                                                       | 24 or more hr on shift                | 828 (90%)               | 91 (10%)  | 0.93 (0.61 - 1.41)                  | 1.00 (0.67 - 1.50)                  | 0.88 (0.59 - 1.33)                  |
| <b>Fire responses during pregnancy</b>                |                                       |                         |           |                                     |                                     |                                     |
| Worked fire/rescue calls at pregnancy start           |                                       |                         |           |                                     |                                     |                                     |
|                                                       | No                                    | 114 (90%)               | 12 (10%)  | 1.00 (Ref.)                         | 1.00 (Ref.)                         | 1.00 (Ref.)                         |
|                                                       | Yes                                   | 1061 (88%)              | 144 (12%) | 1.331 (0.77 - 2.31)                 | 1.27 (0.72 - 2.25)                  | 1.16 (0.68 - 1.99)                  |
| Number of fires responded to during pregnancy         |                                       |                         |           |                                     |                                     |                                     |
|                                                       | 0 fires                               | 301 (87%)               | 45 (13%)  | 1.00 (Ref.)                         | 1.00 (Ref.)                         | 1.00 (Ref.)                         |
|                                                       | 1-4 fires                             | 464 (86%)               | 73 (14%)  | 1.12 (0.77 - 1.61)                  | 1.14 (0.79 - 1.63)                  | 1.12 (0.78 - 1.61)                  |
|                                                       | ≥5 fires                              | 383 (92%)               | 32 (8%)   | 0.77 (0.49 - 1.22)                  | 0.76 (0.48 - 1.89)                  | 0.83 (0.54 - 1.28)                  |
| <b>Work restriction during pregnancy</b>              |                                       |                         |           |                                     |                                     |                                     |
| Was work restricted during pregnancy?                 |                                       |                         |           |                                     |                                     |                                     |
|                                                       | No                                    | 256 (87%)               | 38 (13%)  | 1.00 (Ref.)                         | 1.00 (Ref.)                         | 1.00 (Ref.)                         |
|                                                       | Yes                                   | 909 (89%)               | 113 (11%) | 0.95 (0.66 - 1.39)                  | 0.99 (0.68 - 1.42)                  | 0.98 (0.67 - 1.44)                  |
| Timing of start of work restriction                   |                                       |                         |           |                                     |                                     |                                     |
|                                                       | None/during 3 <sup>rd</sup> trimester | 317 (86%)               | 51 (14%)  | 1.00 (Ref.)                         | 1.00 (Ref.)                         | 1.00 (Ref.)                         |
|                                                       | 2 <sup>nd</sup> trimester             | 505 (92%)               | 41 (8%)   | 0.64 (0.42 - 0.98)                  | 0.66 (0.43 - 1.00)                  | 0.67 (0.44 - 1.02)                  |
|                                                       | 1 <sup>st</sup> trimester             | 351 (86%)               | 59 (14%)  | 1.12 (0.77 - 1.62)                  | 1.09 (0.76 - 1.57)                  | 1.05 (0.72 - 1.54)                  |

RR= Relative risk; 95% CI= 95% confidence interval; BMI= Body mass index (kg/m<sup>2</sup>); Combination= does wildland firefighting in addition to working for a career or volunteer department<sup>a</sup> Generalized estimating equations with Poisson distribution and sandwich variance estimators were used to estimate risk ratios and 95% CIs.<sup>b</sup> 102 total pregnancies had missing information (Shift schedule (3), Worked fire/rescue calls (5), Number of fires (39), Work restriction (22), and Time of work restriction (33)) and were not included in those models.<sup>c</sup> Model 2 is adjusted for age at pregnancy (modeled as age at pregnancy and age at pregnancy<sup>2</sup>), highest education completed (some college/at least college degree), gravidity (yes/no), BMI (<30 kg/m<sup>2</sup> / ≥30 kg/m<sup>2</sup>), and smoking status (current or former/never). Education, BMI, and smoking status were measured in 2017 at time of survey. Gravidity was assessed for each pregnancy.<sup>d</sup> Model 3 is Model 2 additionally adjusted for previous preterm birth (nulligravid/no/yes).<sup>e</sup> Model 4 is Model 2 additionally adjusted for gestational hypertension (yes/not reported).
